# Supplementary material for: Type VI secretion system killing by commensal Neisseria is influenced by expression of type four pili
Source: eLife. 2021 Jul 7;10:e63755. doi: 10.7554/eLife.63755 (PMC8263058; doi:10.7554/eLife.63755)
Supplement: Figure 1—source data 2. [file elife-63755-fig1-data2.xlsx]

## Sheet: Figure 1 data 1
			Prey cell strain (CFU/mL)	Time point
			N. cinerea 27178A	4 h
Attacker strain	Exp1	Exp1	Exp1	Exp2	Exp2	Exp2	Exp3	Exp3	Exp3
N. cinerea 346T Wt	5300000	3900000	9000000	10000000	3500000	7300000	570000	1100000	560000
N. cinerea 346T ΔT6SS	52000000	48000000	41000000	45000000	50000000	47000000	45000000	41000000	42000000
			Prey cell strain (CFU/mL)	Time point
			N. cinerea 27178A	24 h
Attacker strain	Exp1	Exp1	Exp1	Exp2	Exp2	Exp2	Exp3	Exp3	Exp3
N. cinerea 346T Wt	5500000	12000000	8000000	5700000	9800000	14000000	51000000	35000000	49000000
N. cinerea 346T ΔT6SS	270000000	240000000	310000000	330000000	220000000	150000000	160000000	150000000	170000000
