# Supplementary material for: Type VI secretion system killing by commensal Neisseria is influenced by expression of type four pili
Source: eLife. 2021 Jul 7;10:e63755. doi: 10.7554/eLife.63755 (PMC8263058; doi:10.7554/eLife.63755)
Supplement: Figure 2—source data 1. [file elife-63755-fig2-data1.xlsx]

## Sheet: Figure 2 data 1
			Exp1			Exp2				Exp1			Exp2				Exp1			Exp2
Neisseria cinerea 346T strains		No foci	No foci	No foci	No foci	No foci	No foci		1 focus	1 focus	1 focus	1 focus	1 focus	1 focus		2+ foci	2+ foci	2+ foci	2+ foci	2+ foci	2+ foci		T6SS foci phenotype of cells
ΔtssB::tssB-sfGFP		47.4	23.9	36.4583	41.7808	25			49.7	71.7	53.125	52.7397	67.8571			2.9	4.3	10.4167	5.47945	7.14286			% of cells displaying the T6SS phenotype
ΔtssBΔtssM::tssB-sfGFP		95.082	95.0139	93.3333	95.2381	97.8947	96.7742		4.09836	4.98615	6.66667	4.7619	2.10526	3.22581		0.819672	0	0	0	0	0		% of cells displaying the T6SS phenotype
