# Supplementary material for: Type VI secretion system killing by commensal Neisseria is influenced by expression of type four pili
Source: eLife. 2021 Jul 7;10:e63755. doi: 10.7554/eLife.63755 (PMC8263058; doi:10.7554/eLife.63755)
Supplement: Figure 5—source data 1. [file elife-63755-fig5-data1.xlsx]

## Sheet: Fig 5 source data 1
		E.coli DH5 strains			E.coli DH5 strains			E.coli DH5 strains
Time (mins)	Vector			(ssPelB)Nte1			(ssPelB)Nte1+Nti1
0	0.116	0.11	0.116	0.11	0.116	0.112	0.118	0.112	0.116
60	0.29	0.232	0.29	0.302	0.266	0.28	0.328	0.256	0.3
90	0.64	0.51	0.64	0.66	0.66	0.61	0.61	0.59	0.67
120	1.04	0.91	0.96	0.86	0.65	0.92	1.08	0.88	1.07	OD600 values
180	1.94	1.91	1.81	0.72	0.59	0.76	1.81	1.53	2.06
240	2.04	2.19	1.98	0.73	0.6	0.58	1.99	1.95	1.95
300	2.17	2.33	2.01	0.7	0.64	0.61	2.18	1.88	2.36
	Exp1	Exp2	Exp3	Exp1	Exp2	Exp3	Exp1	Exp2	Exp3
		E.coli DH5 strains			E.coli DH5 strains			E.coli DH5 strains
Time (mins)	Vector			Nte2			Nte2+Nti2
0	0.1	0.1	0.1	0.1	0.1	0.1	0.1	0.1	0.1
60	0.25	0.34	0.19	0.23	0.29	0.16	0.27	0.3	0.16
120	0.94	1.01	0.89	0.59	0.68	0.6	1.04	0.86	0.61	OD600 values
180	1.64	1.88	1.8	0.72	0.88	0.84	1.88	1.48	1.44
240	3.35	3.25	2.45	1.1	0.95	1.1	3.4	3	2.6
300	2.75	3.15	2.7	0.85	1.15	0.95	3.25	3	2.65
	Exp1	Exp2	Exp3	Exp1	Exp2	Exp3	Exp1	Exp2	Exp3
		E.coli DH5 strains			E.coli DH5 strains			E.coli DH5 strains
Time (mins)	Vector			Nte3			Nte3+Nti3
0	0.1	0.1	0.1	0.1	0.1	0.1	0.1	0.1	0.1
60	0.25	0.34	0.19	0.24	0.29	0.22	0.27	0.31	0.2
120	0.94	1.01	0.89	0.76	0.97	0.92	1.06	1.01	0.97
180	1.64	1.88	1.8	1.2	1.46	1.38	1.84	2.06	1.86	OD600 values
240	3.35	3.25	2.45	1.2	1.8	1.3	2.9	2.95	3.25
300	2.75	3.15	2.7	1.5	1.5	1.2	2.85	3.1	2.8
	Exp1	Exp2	Exp3	Exp1	Exp2	Exp3	Exp1	Exp2	Exp3
		E.coli DH5 strains			E.coli DH5 strains			E.coli DH5 strains
Time (mins)	Vector			Nte4			Nte4+Nti4
0	0.1	0.1	0.1	0.1	0.1	0.1	0.1	0.1	0.1
60	0.25	0.34	0.19	0.27	0.28	0.21	0.33	0.25	0.19
120	0.94	1.01	0.89	0.91	0.83	0.89	1.17	0.92	0.94
180	1.64	1.88	1.8	1.44	1.42	1.46	1.96	1.88	1.82	OD600 values
240	3.35	3.25	2.45	1.6	1.8	1.5	3	2.85	2.45
300	2.75	3.15	2.7	1.45	1.5	1.55	2.85	2.8	2.7
	Exp1	Exp2	Exp3	Exp1	Exp2	Exp3	Exp1	Exp2	Exp3
		E.coli DH5 strains			E.coli DH5 strains			E.coli DH5 strains
Time (mins)	Vector			Nte5			Nte5+Nti5
0	0.1	0.1	0.1	0.1	0.1	0.1	0.1	0.1	0.1
60	0.25	0.34	0.19	0.27	0.196667	0.161667	0.24	0.3	0.25
120	0.94	1.01	0.89	0.9	0.91	0.85	0.86	1.01	0.94
180	1.64	1.88	1.8	1.58	1.72	1.7	1.54	2.1	1.84	OD600 values
240	3.35	3.25	2.45	2	2.05	1.95	2.3	2.9	2.65
300	2.75	3.15	2.7	1.85	2	1.9	2.6	3.05	2.75
	Exp1	Exp2	Exp3	Exp1	Exp2	Exp3	Exp1	Exp2	Exp3
		E.coli DH5 strains			E.coli DH5 strains			E.coli DH5 strains
Time (mins)	Vector			Nte6R1300S			Nte6+Nti6
0	0.1	0.1	0.1	0.1	0.1	0.1	0.1	0.1	0.1
60	0.27	0.27	0.25	0.23	0.25	0.25	0.26	0.24	0.24
120	1.15	1.1	1.1	1.25	1	1	1.15	1.05	1.05
180	2.6	2.5	2.5	2	1.8	1.9	2.3	2.3	2.3	OD600 values
240	3.2	2.9	3.1	1.9	1.6	2	3.1	3	3.3
300	3.4	3.3	3.4	1.9	2.1	1.9	3.3	3.1	3.2
	Exp1	Exp2	Exp3	Exp1	Exp2	Exp3	Exp1	Exp2	Exp3
