# Supplementary material for: Type VI secretion system killing by commensal Neisseria is influenced by expression of type four pili
Source: eLife. 2021 Jul 7;10:e63755. doi: 10.7554/eLife.63755 (PMC8263058; doi:10.7554/eLife.63755)
Supplement: Figure 6—source data 1. [file elife-63755-fig6-data1.xlsx]

## Sheet: Fig 6 source data 1
			Prey cell strain (CFU/mL)	Time point
			Nm8013	4 h
Attacker strain	Exp1	Exp1	Exp1	Exp2	Exp2	Exp2	Exp3	Exp3	Exp3
N. cinerea 346T Wt	45000	40000	40000	66000	84666.7	87500	32000	35000	32000
N. cinerea 346T ΔT6SS	1900000	2100000	1900000	3.88333e+06	3850000	3.53333e+06	1500000	1500000	1600000
			Prey cell strain (CFU/mL)	Time point
			NmMC58	4 h
Attacker strain	Exp1	Exp1	Exp1	Exp2	Exp2	Exp2	Exp3	Exp3	Exp3
N. cinerea 346T Wt	7500	40000	15000	25000	29000	29000	44000	26000	19000
N. cinerea 346T ΔT6SS	2400000	2500000	2300000	4116667	3733333	3683333	2700000	2100000	2300000
			Prey cell strain (CFU/mL)	Time point
			NmS3	4 h
Attacker strain	Exp1	Exp1	Exp1	Exp2	Exp2	Exp2	Exp3	Exp3	Exp3
N. cinerea 346T Wt	28000	15000	13000	37833.3	91000	70166.7	150000	130000	250000
N. cinerea 346T ΔT6SS	1700000	1500000	1700000	5075000	4133333	4233333	2700000	3300000	3000000
