# Supplementary material for: Type VI secretion system killing by commensal Neisseria is influenced by expression of type four pili
Source: eLife. 2021 Jul 7;10:e63755. doi: 10.7554/eLife.63755 (PMC8263058; doi:10.7554/eLife.63755)
Supplement: Figure 6—source data 2. [file elife-63755-fig6-data2.xlsx]

## Sheet: Fig 6 source data 2
			Prey cell strain (CFU/mL)	Time point
			NgFA1090	4 h
Attacker strain	Exp1	Exp1	Exp1	Exp2	Exp2	Exp2	Exp3	Exp3	Exp3
N. cinerea 346T Wt	3400000	3900000	3500000	2700000	3400000	2300000	6200000	4100000	4700000
N. cinerea 346T ΔT6SS	25000000	19000000	17000000	15000000	21000000	20000000	14000000	16000000	14000000
