# Supplementary material for: Type VI secretion system killing by commensal Neisseria is influenced by expression of type four pili
Source: eLife. 2021 Jul 7;10:e63755. doi: 10.7554/eLife.63755 (PMC8263058; doi:10.7554/eLife.63755)
Supplement: Figure 6—source data 3. [file elife-63755-fig6-data3.xlsx]

## Sheet: Fig 6 Source data 3
			Prey cell strain Survival (CFU/mL)	Time point
			NmMC58	4 h
											Average CFU (after 3 exp) of prey strain against N. cinerea ΔT6SS
Attacker strain	Exp1	Exp1	Exp1	Exp2	Exp2	Exp2	Exp3	Exp3	Exp3
N. cinerea 346T Wt	7500	40000	15000	25000	29000	29000	44000	26000	19000		26055.6
N. cinerea 346T ΔT6SS	2400000	2500000	2300000	4116667	3733333	3683333	2700000	2100000	2300000		2.87037e+06
			Prey cell strain Survival (CFU/mL)	Time point
			NmMC58ΔsiaD	4 h
											Average CFU (after 3 exp) of prey strain against N. cinerea ΔT6SS
Attacker strain	Exp1	Exp1	Exp1	Exp2	Exp2	Exp2	Exp3	Exp3	Exp3
N. cinerea 346T Wt	4500	3633.33	4633.33	7600	3083.33	2416.67	7000	5900	32000		7862.96
N. cinerea 346T ΔT6SS	3000000	3500000	2900000	3366667	3300000	3200000	2800000	2800000	2800000		3.07407e+06
