# Supplementary material for: Type VI secretion system killing by commensal Neisseria is influenced by expression of type four pili
Source: eLife. 2021 Jul 7;10:e63755. doi: 10.7554/eLife.63755 (PMC8263058; doi:10.7554/eLife.63755)
Supplement: Figure 7—source data 1. [file elife-63755-fig7-data1.xlsx]

## Sheet: Figure 7 Source data 1
			Prey cell strain (CFU/mL)	Time point
			N. cinerea sfCherry-expressing 346TΔnte/i3-5	4 h
Attacker strain	Exp1	Exp1	Exp1	Exp2	Exp2	Exp2	Exp3	Exp3	Exp3
N. cinerea 346T Wt	19000000	19000000	6500000	98000000	95000000	84000000	76000000	138000000	75000000
N. cinerea 346T ΔTssM	59000000	59000000	78000000	150000000	150000000	130000000	188000000	212000000	153000000
		6.53333e+07			1.43333e+08			1.84333e+08		Average CFU of prey strain against N. cinerea ΔTssM
	0.290816	0.290816	0.0994898	0.683721	0.662791	0.586047	0.412297	0.748644	0.406872	Relative survival is defined as the fold change in recovery of prey strain following incubation with wild-type N. cinerea compared to N. cinerea ΔTssM - Relative Survival value of 1 means that is equivalent to survival against TssM mutant attacker
										Formula: prey CFU vs WT attacker/prey CFU vs ΔT6SS attacker
			Prey cell strain (CFU/mL)	Time point
			N. cinerea sfCherry-expressing 346TΔnte/i3-5ΔpilE1/2	4 h
Attacker strain	Exp1	Exp1	Exp1	Exp2	Exp2	Exp2	Exp3	Exp3	Exp3
N. cinerea 346T Wt	42000000	12000000	31000000	100000000	52000000	discarded as bacterial colonies unable to count	126000000	86000000	63300000
N. cinerea 346T ΔTssM	39000000	52000000	23000000	90000000	83000000	90000000	62300000	153000000	142000000
		38000000			8.76667e+07			119100000		Average CFU of prey strain against N. cinerea ΔTssM
	1.10526	0.315789	0.815789	1.14068	0.593156	discarded as bacterial colonies unable to count	1.05793	0.722082	0.531486	Relative survival is defined as the fold change in recovery of prey strain following incubation with wild-type N. cinerea compared to N. cinerea ΔTssM - Relative Survival value of 1 means that is equivalent to survival against TssM mutant attacker
										Formula: prey CFU vs WT attacker/prey CFU vs ΔT6SS attacker
Input -number of CFU/mL		Input -number of CFU/mL			Input -number of CFU/mL		Input -number of CFU/mL
N. cinerea sfCherry-expressing 346TΔnte/i3-5 (prey)		N. cinerea sfCherry-expressing 346TΔnte/i3-5ΔpilE1/2 (prey)			WT (attacker)		ΔTssM (attacker)
89000000		6.06667e+07			1.29333e+09		590000000		Exp1
27000000		15000000			330000000		6.33333e+07		Exp2
9.33333e+07		73000000			1.13333e+09		7.56667e+08		Exp3
6.97778e+07		4.95556e+07			9.18889e+08		470000000		average
