# Supplementary material for: Type VI secretion system killing by commensal Neisseria is influenced by expression of type four pili
Source: eLife. 2021 Jul 7;10:e63755. doi: 10.7554/eLife.63755 (PMC8263058; doi:10.7554/eLife.63755)
Supplement: Figure 8—source data 1. [file elife-63755-fig8-data1.xlsx]

## Sheet: Figure 8 Source data 1
		Prey cell strain (CFU/mL)	Time point
		N. cinerea sfCherry-expressing 346TΔnte/i3-5	24 h			% Survival Relative to input
	Exp1	Exp2	Exp3		Exp1	Exp2	Exp3
Attacker strain	88333.3	146667	159667		0.172078	0.88	0.656164
N. cinerea sfGFP-expressing 346T WT	79333.3	290000	197333		0.154545	1.74	0.810959
	93000	240000	180000		0.181169	1.44	0.739726
	86888.9	225556	179000		0.169264	1.35333	0.735616	Average	Relative survival is defined as the percentage in recovery of prey strain following incubation with attacker strain compared to input CFU of respective prey strain
		Prey cell strain (CFU/mL)	Time point
		N. cinerea sfCherry-expressing 346TΔnte/i3-5ΔpilE1/2	24 h			% Survival Relative to input
	Exp1	Exp2	Exp3		Exp1	Exp2	Exp3
Attacker strain	1470000	19100000	5.36667e+07		3.61475	102.321	102.548
N. cinerea sfGFP-expressing 346T WT	1.90667e+06	20900000	53000000		4.68852	111.964	101.274
	676667	1.62667e+07	50000000		1.66393	87.1429	134.328
	1.35111e+06	1.87556e+07	5.22222e+07		3.3224	100.476	112.717	Average	Relative survival is defined as the percentage in recovery of prey strain following incubation with attacker strain compared to input CFU of respective prey strain
		Prey cell strain (CFU/mL)	Time point
		N. cinerea sfCherry-expressing 346TΔnte/i3-5	24 h			% Survival Relative to input
	Exp1	Exp2	Exp3		Exp1	Exp2	Exp3
Attacker strain	141000	416667	290000		0.274675	2.5	1.19178
N. cinerea sfGFP-expressing 346TΔpilE1/2	169000	623333	210000		1.014	3.74	0.863014
	157667	566667	273333		0.647945	3.4	1.12329
	155889	535556	257778		0.64554	3.21333	1.05936	Average	Relative survival is defined as the percentage in recovery of prey strain following incubation with attacker strain compared to input CFU of respective prey strain
		Prey cell strain (CFU/mL)	Time point
		N. cinerea sfCherry-expressing 346TΔnte/i3-5ΔpilE1/2	24 h			% Survival Relative to input
	Exp1	Exp2	Exp3		Exp1	Exp2	Exp3
Attacker strain	109000	510000	1.33667e+06		0.268033	2.73214	2.55414
N. cinerea sfGFP-expressing 346TΔpilE1/2	119000	710000	1180000		0.292623	3.80357	2.25478
	77666.7	610000	1.01333e+06		0.190984	1.16561	0.0193631
	101889	610000	1.17667e+06		0.250546	2.56711	1.60943	Average	Relative survival is defined as the percentage in recovery of prey strain following incubation with attacker strain compared to input CFU of respective prey strain
Input -number of CFU/mL		Input -number of CFU/mL			Input -number of CFU per ml		Input -number of CFU per ml
N. cinerea sfCherry-expressing 346TΔnte/i3-5 (prey)		N. cinerea sfCherry-expressing 346TΔnte/i3-5ΔpilE1/2 (prey)			N. cinerea sfGFP-expressing 346T WT (attacker)		N. cinerea sfGFP-expressing 346TΔpilE1/2 (attacker)
5.13333e+07		4.06667e+07			1.76667e+09		1.26667e+09		exp1
1.66667e+07		1.86667e+07			6.66667e+08		610000000		exp2
2.43333e+07		5.23333e+07			6.46667e+08		4.06667e+08		exp3
3.07778e+07		3.72222e+07			1.02667e+09		7.61111e+08		average
